# Supplementary material for: Pyrodextrin enhances intestinal function through changing the intestinal microbiota composition and metabolism in early weaned piglets
Source: PubMed Central journal article supplement (PMC7162831; doi:10.1007/s00253-020-10419-z), 2020-03-03
Supplement: 253_2020_10419_MOESM1_ESM.pdf [file 253_2020_10419_MOESM1_ESM.pdf]

**Journal name: Applied Microbiology and Biotechnology**

**Manuscript title: Pyrodextrin enhances intestinal function through changing the intestinal microbiota composition and metabolism in early weaned piglets**

Lihui Zhu<sup>1#</sup>, Rongrong Liao<sup>1#</sup>, Weilong Tu<sup>1,2#</sup>, Yonghong Lu<sup>1\*</sup>, Xuan Cai<sup>1,2\*</sup>

<sup>1</sup>Institute of Animal Husbandry & Veterinary Science, Shanghai Academy of Agricultural Sciences, Shanghai 201106, PR China;

<sup>2</sup>Shanghai Engineering Research Center of Breeding Pig, Shanghai 201106, PR China

#These authors contributed equally to this work

**\* Correspondence:**

**Xuan Cai**

E-mail:caixuan1985911@163.com, ORCID: 0000-0003-4413-8637,

Tel.: 86-21-62207862

**\* Co-Correspondence:**

**Yonghong Lu**

E-mail:luyonghong@163.com, Tel.: 86-21-62207862

Shanghai Academy of Agricultural Sciences, 2901 Beidi Road, 201106, Shanghai, China.

**Table S1** Primers for quantitative RT-PCR

| Gene name        | Primer (5'→3')                                     | GenBank no.  | Product (bp) |
|------------------|----------------------------------------------------|--------------|--------------|
| <i>β-actin</i>   | F: TGCGGGACATCAAGGAGAAG<br>R: AGTTGAAGGTGGTCTCGTGG | NM_001164650 | 216          |
| <i>Occludin</i>  | F: GCTGGAGGAAGACTGGAT<br>R: ATCCGCAGATCCCTTAAC     | NM_001163647 | 244          |
| <i>ZO-1</i>      | F: ACCCACCAAACCCACCAA<br>R: CCATCTCTTGCCAAACTATC   | CK_453343    | 123          |
| <i>Claudin-1</i> | F: AGAAGATGCGGATGGCTGTC<br>R: CCCAGAAGGCAGGAGAAGC  | NM_001244539 | 193          |

**Table S2** Alpha diversity indices of the bacterial communities

| Group          | Valid length of sequences (bp) | Clean tags | Valid percent (%) | OUT counts | Chao1 estimator | Good's coverage | Observed species | Shannon index | Simpson index |
|----------------|--------------------------------|------------|-------------------|------------|-----------------|-----------------|------------------|---------------|---------------|
| <b>25-d CF</b> | 427                            | 28,669     | 62.87             | 494        | 499             | 0.98            | 371              | 5.73          | 0.90          |
| <b>25-d TF</b> | 426                            | 31,990     | 66.50             | 697        | 683             | 0.97            | 512              | 6.63          | 0.96          |
| <b>42-d CI</b> | 429                            | 34,425     | 62.89             | 1,173      | 1,086           | 0.95            | 760              | 7.50          | 0.98          |
| <b>42-d TI</b> | 429                            | 29,573     | 65.13             | 1,018      | 937             | 0.96            | 655              | 7.07          | 0.97          |
| <b>42-d CF</b> | 426                            | 32,273     | 62.27             | 516        | 509             | 0.98            | 382              | 6.33          | 0.96          |
| <b>42-d TF</b> | 425                            | 33,537     | 60.73             | 628        | 605             | 0.98            | 448              | 6.43          | 0.96          |
| <b>Mean</b>    | 427                            | 31,745     | 63.00             | 754        | 720             | 0.97            | 521              | 6.62          | 0.96          |

**Table S3** Alpha diversity measures of bacterial communities

| Item                    | Feces at 25 days of age |           |                | Ileum content at 42 days of age |           |                | Feces at 42 days of age |           |                |
|-------------------------|-------------------------|-----------|----------------|---------------------------------|-----------|----------------|-------------------------|-----------|----------------|
|                         | 25-d CF                 | 25-d TF   | <i>P</i> value | 42-d CI                         | 42-d TI   | <i>P</i> value | 42-d CF                 | 42-d TF   | <i>P</i> value |
| <b>Chao1 estimator</b>  | 499±57                  | 683±89    | 0.26           | 1086±160                        | 937±187   | 0.36           | 509±48                  | 605±67    | 0.56           |
| <b>Good's coverage</b>  | 0.98±0.00               | 0.97±0.00 | 0.35           | 0.95±0.01                       | 0.96±0.01 | 0.45           | 0.98±0.00               | 0.98±0    | 0.56           |
| <b>Observed species</b> | 371±50                  | 512±70    | 0.18           | 760±93                          | 655±116   | 0.32           | 382±32                  | 448±53    | 0.54           |
| <b>Shannon index</b>    | 5.73±0.50               | 6.63±0.42 | 0.06           | 7.5±0.27                        | 7.07±0.35 | 0.37           | 6.33±0.09               | 6.43±0.2  | 0.83           |
| <b>Simpson index</b>    | 0.9±0.05                | 0.96±0.02 | 0.06           | 0.98±0.00                       | 0.97±0.01 | 0.81           | 0.96±0                  | 0.96±0.01 | 0.93           |

## Diarrhea index

A total of 24 litters of landrace piglets (8-12 piglets per litter) with similar birth weights were randomly divided into C (Control), L (Low concentration), M (Middle concentration), H (High concentration) group, 6 litters per group. The piglets were kept with the sow in conventional farrowing pens and suckled until 21 d of age. From 14 to 56 d of age, piglets in the control weaning group had ad libitum access to the basal diet, while the L, M, and H group piglets were fed the basal diet supplemented with 250 mg/kg, 500 mg/kg, and 1000 mg/kg of PD, respectively. At 21 d of age, all the piglets were weaned and moved from the farrowing pens to nursery pens without mixing any litters.

From 22 d to 56 d of age, the piglet diarrhea was recorded once a day at 8:30-10:30 in the morning. The diarrhea score of piglets was also estimated according to **Table S4**. Firstly, observed the condition of the feces in the enclosure, and if the feces in the enclosure are formed, it is recorded as no diarrhea; if there is no formation or watery feces in the enclosure, the anus of the piglet is observed head by head. Recorded the ear number and the severity of diarrhea. The Diarrhea index was calculated as following:

Diarrhea index = sum of diarrhea scores of each group of piglets during the test period / (experimental days × number of piglets per group)

**Table S4** Standard for diarrhea condition assessment

| Degree of diarrhea | Fecal appearance                                       | Diarrhea score |
|--------------------|--------------------------------------------------------|----------------|
| Normal             | Dry, strip or granule                                  | 0              |
| Mild               | Soft manure, can be formed                             | 1              |
| Moderate           | Thick, not formed, no separation of manure             | 2              |
| Serious            | Liquid, no shape, separation of manure, mucus or thick | 3              |

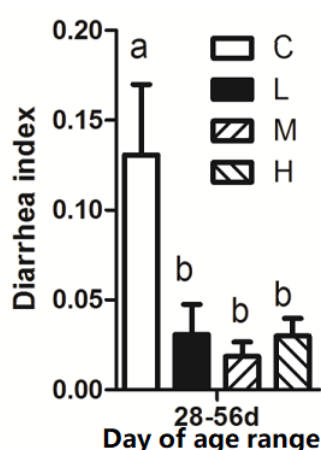

**Fig.S1** Diarrhoea index of weaned pigs fed PD diets formulated with different concentrations. C: Control, 0 mg/kg PD; L: Low concentration, 250 mg/kg PD; M: Middle concentration, 500 mg/kg PD; H: High concentration, 1000 mg/kg PD. <sup>ab</sup>Mean values not sharing the same superscript letters are significantly different from each other ( $P \leq 0.05$ ).
